# Supplementary material for: LDPE Transformation by Exposure to Sequential Low-Pressure Plasma and TiO2/UV Photocatalysis
Source: MDPI journal article supplement (doi:10.3390/molecules26092513), 2021-04-26
Supplement: s1 [file s1]

# LDPE Transformation by Exposure to Sequential Low-Pressure Plasma and TiO<sub>2</sub>/UV Photocatalysis

Luis D. Gómez-Méndez<sup>1,2</sup>, Luis C. Jiménez-Borrego<sup>2</sup>, Alejandro Pérez-Flórez<sup>3</sup>, Raúl A. Poutou-Piñales<sup>4</sup>, Aura M. Pedroza-Rodríguez<sup>1</sup>, Juan C. Salcedo-Reyes<sup>2</sup>, Andrés Vargas<sup>5</sup>, and Johan M. Bogoya<sup>6</sup>

**Supplementary Material 1:** *Direct Current low-pressure plasma (DC-LLP) - Assembly and operating conditions)*

The chamber was connected through a butterfly valve to a turbo vacuum pump (Pfeiffer™). Vacuum pressure was monitored through Pirani sensors and a cold cathode. Coaxial electrodes were (made of conducting flat parallel 8 cm diameter disks (cathode: copper (Cu<sup>2+</sup>) and aluminum (Al<sup>2+</sup>), anode: copper (Cu<sup>2+</sup>)) were and placed vertically concerning the chamber with 5.6 cm between them. With the anode grounded, the voltage between the electrodes ranged between 500 and 1000 VDC. Clean LDPE sheets were placed in the anode that served as the LDPE substrate-holder. To generate the DC-LPP the chamber was cleaned performing a vacuum up to  $9 \times 10^{-5}$  mbar employing the butterfly valve with the turbo molecular system. Subsequently to dose the vacuum the butterfly valve was partially closed, and the vacuum was reduced to  $4 \times 10^{-4}$  mbar. Once this pressure was reached the dosing valve connecting with the chamber was opened before the previous injection of Ar-O<sub>2</sub> mix at the selected concentration. The pressure was adjusted between  $2 \times 10^{-3}$  and  $2 \times 10^{-2}$  mbar to obtain a DC - EGD plasma. The system could reach equilibrium and voltage was increased until plasma appeared with the minimum of electric current required (Figure S1)

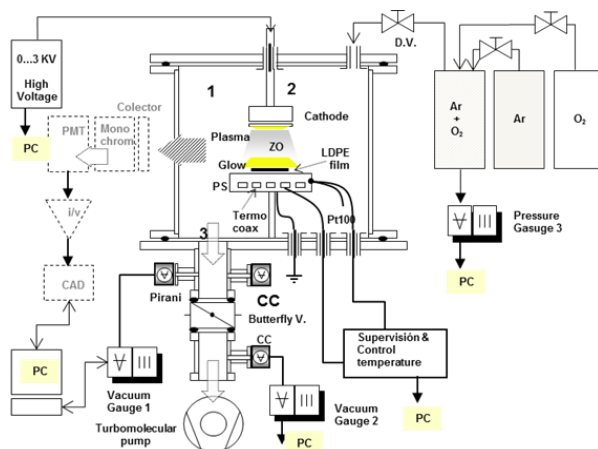

**Figure S1.** Schematic diagram of the plasma reactor employed in this study.

**Supplementary Material 2:** *Plasma discharge condition selection*

Initially, preliminary assays took place for each gas and then for the mix employing different voltages and pressures. For 100% O<sub>2</sub> (v/v) the following pressures were evaluated:  $2.2 \times 10^{-2}$ ,  $2.4 \times 10^{-2}$ ,  $2.6 \times 10^{-2}$ ,  $2.8 \times 10^{-2}$ , and  $3.0 \times 10^{-2}$  mbar, with 1100, 1000, 900, 800, 700 and 600 VDC. The discharge time was set at 6 minutes. The pressures were the same for Ar; for this gas, voltages were 1300, 1200, 1100, 1000, 900, 800, 700, 600, and 500 V. For the Ar-O<sub>2</sub> 1:1 mix the same pressures evaluated for gases in separate were considered, the same voltages were verified including a lower voltage at 400 V. The considerations to select parameter combinations (gas concentration, pressure, voltage, and time) were: (1) that they would not burn or damage LDPE sheets and (2) voltage conditions as a function of pressure would generate a stable plasma.

**Table S1.** Treatments employed for oxygen, argon, and argon-oxygen (50:50) mix.

| Treatment | Type of Gas       | Gas concentration (%) | Vacuum pressure (10 <sup>-2</sup> mbar) | Voltage (V) |
|-----------|-------------------|-----------------------|-----------------------------------------|-------------|
| 1         | O <sub>2</sub>    | 100                   | 2.4                                     | 1,000       |
| 2         | O <sub>2</sub>    | 100                   | 2.8                                     | 700         |
| 3         | O <sub>2</sub>    | 100                   | 2.8                                     | 800         |
| 4         | O <sub>2</sub>    | 100                   | 3.0                                     | 600         |
| 5         | O <sub>2</sub>    | 100                   | 3.0                                     | 700         |
| 1         | Ar                | 100                   | 2.2                                     | 1,000       |
| 2         | Ar                | 100                   | 2.2                                     | 1,100       |
| 3         | Ar                | 100                   | 2.2                                     | 1,300       |
| 4         | Ar                | 100                   | 2.4                                     | 800         |
| 5         | Ar                | 100                   | 2.4                                     | 900         |
| 6         | Ar                | 100                   | 2.6                                     | 900         |
| 7         | Ar                | 100                   | 2.6                                     | 1,000       |
| 8         | Ar                | 100                   | 2.8                                     | 800         |
| 9         | Ar                | 100                   | 2.8                                     | 900         |
| 10        | Ar                | 100                   | 3.0                                     | 500         |
| 11        | Ar                | 100                   | 3.0                                     | 600         |
| 12        | Ar                | 100                   | 3.0                                     | 700         |
| 13        | Ar                | 100                   | 3.0                                     | 800         |
| 1         | Ar/O <sub>2</sub> | 50-50                 | 2.2                                     | 1,000       |
| 2         | Ar/O <sub>2</sub> | 50-50                 | 2.2                                     | 1,200       |
| 3         | Ar/O <sub>2</sub> | 50-50                 | 2.4                                     | 800         |
| 4         | Ar/O <sub>2</sub> | 50-50                 | 2.4                                     | 900         |
| 5         | Ar/O <sub>2</sub> | 50-50                 | 2.4                                     | 1,000       |
| 6         | Ar/O <sub>2</sub> | 50-50                 | 2.6                                     | 700         |
| 7         | Ar/O <sub>2</sub> | 50-50                 | 2.6                                     | 800         |
| 8         | Ar/O <sub>2</sub> | 50-50                 | 2.6                                     | 900         |
| 9         | Ar/O <sub>2</sub> | 50-50                 | 2.8                                     | 500         |
| 10        | Ar/O <sub>2</sub> | 50-50                 | 2.8                                     | 600         |
| 11        | Ar/O <sub>2</sub> | 50-50                 | 2.8                                     | 700         |
| 12        | Ar/O <sub>2</sub> | 50-50                 | 3.0                                     | 400         |
| 13        | Ar/O <sub>2</sub> | 50-50                 | 3.0                                     | 500         |
| 14        | Ar/O <sub>2</sub> | 50-50                 | 3.0                                     | 600         |

**Table S2:** ANOVA results for Ar, O<sub>2</sub> and Ar-O<sub>2</sub> (50:50) mix.

| Final Angle (°) 100 % Argon            |           |           |           |                |                     |
|----------------------------------------|-----------|-----------|-----------|----------------|---------------------|
| Descriptions                           | <b>SS</b> | <b>dF</b> | <b>MS</b> | <b>F Value</b> | <b>Proba &gt; f</b> |
| Treatment                              | 1431      | 11        | 130.1     | 2.963          | <b>0.0126</b>       |
| Residual                               | 1054      | 24        | 43.91     |                |                     |
| R square                               | 0.5759    |           |           |                |                     |
| Total                                  | 2485.57   | 35        |           |                |                     |
| Final Angle (°) 100 % Oxygen           |           |           |           |                |                     |
| Descriptions                           | <b>SS</b> | <b>dF</b> | <b>MS</b> | <b>F Value</b> | <b>Proba &gt; f</b> |
| Treatment                              | 67.92     | 3         | 22.64     | 1.035          | <b>0.4275</b>       |
| Residual                               | 175       | 8         | 21.87     |                |                     |
| R square                               | 0.2796    |           |           |                |                     |
| Total                                  | 243.19    | 11        |           |                |                     |
| Final Angle (°) 50% Oxygen & 50% Argon |           |           |           |                |                     |
| Descriptions                           | <b>SS</b> | <b>dF</b> | <b>MS</b> | <b>F Value</b> | <b>Proba &gt; f</b> |
| Treatment                              | 1024      | 11        | 93.13     | 6.099          | <b>0.0001</b>       |
| Residual                               | 366.5     | 24        | 15.27     |                |                     |
| R square                               | 0.7365    |           |           |                |                     |
| Total                                  | 1391.23   | 35        |           |                |                     |
| Tukey test                             |           |           |           |                |                     |
| Descriptions                           | <b>SS</b> | <b>dF</b> | <b>MS</b> | <b>F Value</b> | <b>Proba &gt; f</b> |
| Treatment                              | 300.3     | 5         | 60.07     | 4.623          | 0.0139              |
| Residual                               | 155.9     | 12        | 12.99     |                |                     |
| R square                               | 0.6583    |           |           |                |                     |
| Total                                  | 456.85    | 17        |           |                |                     |

**Supplementary Material 3:** *Static contact angle*

In this work a spherical cap was assumed, where gravitational effects were negligible [66]. The profile of a sessile droplet (Figure S2) was defined by (Equation (1)):

$$h(x) = R \sqrt{1 - \frac{x^2}{R^2}} - d$$

where: R is the spherical cap radius. According to the geometry from the ratio  $\zeta = b/a$ , where  $\theta$  is defined as (Equation (2)):

$$\sin(\theta) = \frac{2\zeta}{1 + \zeta^2}$$

The contact angle was determined by placing on LDPE's surface 50  $\mu$ L of deionized water. Its mean value and its corresponding dispersion were calculated from three different positions observed on the sample through a JVC™ GZ-EX355 Everio video camera [31].

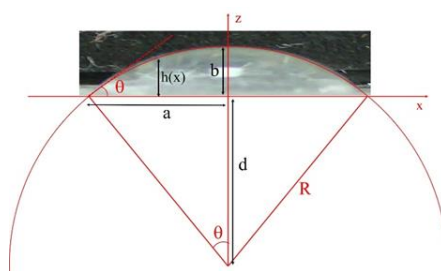

**Figure S2.** Profile of the spherical cap description for a sessile droplet. The image of a representative droplet before plasma treatment.

**Table S3:** SCA, roughness and LDPE's viscoelastic properties obtained during the 2<sup>2</sup>-factorial design.

| Static Contact Angle (%)          |          |                  |               | LDPE Final Weight of (%)          |          |                  |                        |
|-----------------------------------|----------|------------------|---------------|-----------------------------------|----------|------------------|------------------------|
| Factor                            | p value  | Contribution (%) | Stand. Effect | Factor                            | p value  | Contribution (%) | Stand. Effect          |
| Model                             | < 0.0001 |                  | + 43.6        | Model                             | < 0.0001 |                  | + 3.54                 |
| A: pH                             | < 0.0001 | 45               | + 6.5         | A: pH                             | < 0.0001 | 60               | + 0.47                 |
| B: TiO <sub>2</sub> Concentration | < 0.0001 | 40               | + 6.1         | B: TiO <sub>2</sub> concentration | 0.0002   | 38               | + 0.20                 |
| AB                                | 0.6381   | 5                | + 0.5         | AB                                | 0.9002   | 2                | + 5.5x10 <sup>-3</sup> |
| R <sup>2</sup>                    | 0.8223   |                  |               | R <sup>2</sup>                    | 0.8795   |                  |                        |
| CV                                | 9.69     |                  |               | CV                                | 5.46     |                  |                        |
| Adeq Precision                    | 13.4     |                  |               | Adeq Precision                    | 15.630   |                  |                        |
| Young modulus (Mpa)               |          |                  |               | Yield strength (Mpa)              |          |                  |                        |
| Factor                            | p value  | Contribution (%) | Stand. Effect | Factor                            | p value  | Contribution (%) | Stand. Effect          |
| Model                             | < 0.0001 |                  | + 80.74       | Model                             | < 0.0001 |                  | + 4.35                 |
| A: pH                             | < 0.0001 | 33               | - 11.54       | A: pH                             | < 0.0001 | 70               | - 1.02                 |
| B: TiO <sub>2</sub> concentration | < 0.0001 | 33               | - 23.70       | B: TiO <sub>2</sub> concentration | 0.0268   | 20               | - 0.48                 |
| AB                                | < 0.0001 | 33               | - 24.85       | AB                                | 0.0007   | 30               | - 0.82                 |
| R <sup>2</sup>                    | 0.9800   |                  |               | R <sup>2</sup>                    | 0.8100   |                  |                        |
| CV                                | 6.65     |                  |               | CV                                | 18.85    |                  |                        |
| Adeq Precision                    | 40.423   |                  |               | Adeq Precision                    | 9.507    |                  |                        |

**Table S4:** Response variables obtained during factorial design 2<sup>2</sup> (300 h)

|     | pH        | TiO <sub>2</sub> (g L <sup>-1</sup> ) | SCA (°)  | Weight (mg) | Young's modulus (MPa) | Yield strength (MPa) |
|-----|-----------|---------------------------------------|----------|-------------|-----------------------|----------------------|
| T1  | 4.5 ± 0.1 | 1.0 ± 0.1                             | 35 ± 5 a | 3.4 ± 0.5 a | 92 ± 2                | 5 ± 2                |
| T2  | 9.0 ± 0.1 | 1.0 ± 0.1                             | 48 ± 6   | 3.8 ± 0.4   | 117 ± 21 a            | 4 ± 1                |
| T3  | 4.5 ± 0.1 | 10.0 ± 0.1                            | 49 ± 8   | 3.6 ± 0.6 a | 94 ± 4                | 5 ± 2                |
| T4  | 9.0 ± 0.1 | 10.0 ± 0.1                            | 51 ± 7   | 4.2 ± 0.4   | 21 ± 1                | 2 ± 1a               |
| PhC | ND        | ND                                    | 61 ± 9   | 4.2 ± 0.3   | 48 ± 4                | 4 ± 1                |
| Pc  | ND        | ND                                    | 51 ± 7   | 4.9 ± 0.1   | 41 ± 6                | 11 ± 2               |

All treatments: (PEBD + plasma +UV+ TiO<sub>2</sub>)

PhC: Photolysis control (PEBD + plasma + UV)

Pc: Plasma control (PEBD +plasma)

ND: No data
